# Supplementary material for: The Optimized Thickness of Silver Doping on CdS/CdSe for Quantum Dot-Sensitized Solar Cell
Source: Hindawi journal article supplement (doi:10.1155/2019/1069308), 2019-12-29
Supplement: f1 [file 1069308.f1.docx]

**A brief of Supplementary materials**

**
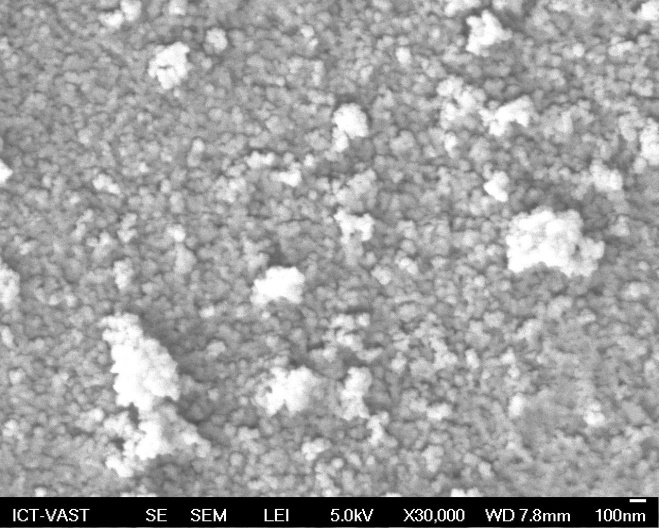
**
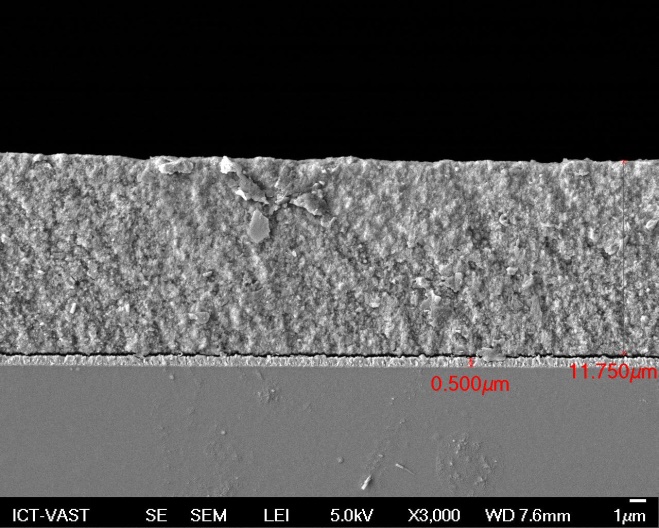


(b)

(a)

**Supplemental Figure 1.** (a) FES-EM image, (b) Cross - section and (c) XRD pattern of TiO2/CdSe:Ag+(3%)/ZnS.

**Supplemental Figure 2.** UV-Vis spectra of TiO2, TiO2/CdS, TiO2/CdS/CdSe**.**

**Supplemental Figure 3.** Photocurrent density – voltage (J-V) curves of QDSSCs with 0%, 3% and 5% of Ag+**.**

**Supplemental Figure 5.** Nyquist plots of QDSSCs with 0%, 3% and 5% of Ag+**.**
